# Supplementary material for: Inflammatory Adipokines, High Molecular Weight Adiponectin, and Insulin Resistance: A Population-Based Survey in Prepubertal Schoolchildren
Source: PLoS One. 2011 Feb 18;6(2):e17264. doi: 10.1371/journal.pone.0017264 (PMC3041818; doi:10.1371/journal.pone.0017264)
Supplement: Table S3 — Spearman's rho correlation coefficients (rs) of leptin, HMW adiponectin, L/HMW and pro-inflammatory adipokines in the combined study population. (DOC) [file pone.0017264.s003.doc]

**Table S3**

|  | Leptin | HMW | L/HMW | Fasting Insulin | HOMA-IR | IL-8 | IL-18 | MCP-1 | RANTES | MIF | sICAM-1 | IP-10 | Resistin |
| --- | --- | --- | --- | --- | --- | --- | --- | --- | --- | --- | --- | --- | --- |
| Leptin | - | -0.192***** | 0.888***** | 0.602**‡** | 0.574**‡** | 0.018**†** | 0.030 | 0.191***** | 0.233***** | 0.207**‡** | 0.146**†** | 0.118**†** | 0.109 |
| HMW | -0.192***** | - | -0.587**‡** | -0.259**‡** | -0.231**‡** | -0.086 | -0.085 | -0.063 | -0.049 | -0.066 | -0.127**†** | -0.105 | -0.027 |
| L/HMW | 0.888***** | -0.587**‡** | - | 0.589**‡** | 0.552**‡** | 0.126**†** | 0.049 | 0.178**§** | 0.217 | 0.205 | 0.180**§** | 0.128**†** | 0.107 |
| Fasting Insulin | 0.602**‡** | -0.259**‡** | 0.589**‡** | - | 0.978**‡** | -0.081 | 0.010 | 0.158**§** | 0.184**§** | 0.189**§** | 0.252**‡** | 0.148**†** | 0.062 |
| HOMA-IR | 0.574**‡** | -0.231**‡** | 0.552**‡** | 0.978**‡** | - | -0.098 | 0.003 | 0.161**§** | 0.157**§** | 0.150**†** | 0.251**‡** | 0.137**†** | 0.045 |
| IL-8 | 0.118**†** | -0.086 | 0.126**†** | -0.081 | -0.098 | - | 0.214 | 0.225**‡** | 0.228**‡** | 0.279**‡** | 0.066 | 0.134**†** | 0.241**‡** |
| IL-18 | 0.030 | -0.085 | 0.049 | 0.010 | 0.003 | 0.214**‡** | - | 0.231**‡** | -0.015 | 0.241**‡** | 0.257**‡** | 0.379**‡** | 0.181**§** |
| MCP-1 | 0.191***** | -0.063 | 0.178**§** | 0.158**§** | 0.161**§** | 0.225**‡** | 0.231**‡** | - | 0.159**‡** | -0.046 | 0.320**‡** | 0.212**‡** | -0.042 |
| RANTES | 0.233***** | -0.049 | 0.217**‡** | 0.184**§** | 0.157**§** | 0.228**‡** | -0.015 | 0.159**§** | - | 0.450**‡** | 0.298**‡** | 0.056 | 0.313**‡** |
| MIF | 0.207**‡** | -0.066 | 0.205**‡** | 0.189**§** | 0.150**†** | 0.279**‡** | 0.241**‡** | -0.046 | 0.450**‡** | - | 0.352**‡** | 0.211**‡** | 0.638**‡** |
| sICAM-1 | 0.146**†** | -0.127**†** | 0.180**§** | 0.252**‡** | 0.251**‡** | 0.066 | 0.257**‡** | 0.320**‡** | 0.298**‡** | 0.352**‡** | - | 0.342**‡** | 0.362**‡** |
| IP-10 | 0.119**†** | -0.105 | 0.128**†** | 0.148**†** | 0.137**†** | 0.134**†** | 0.379**‡** | 0.212**‡** | 0.056 | 0.211**‡** | 0.342**‡** | - | 0.196**§** |
| Resistin | 0.109 | -0.027 | 0.107 | 0.062 | 0.045 | 0.241**‡** | 0.181**§** | -0.042 | 0.313**‡** | 0.638**‡** | 0.362**‡** | 0.196**§** | - |

Spearman’s rho correlation coefficients (r*s*) of leptin, HMW adiponectin, L/HMW and pro-inflammatory adipokines in the combined study population.

******p* =0.001**; †***p*<0.05; **‡***p*<0.0001; **§***p*<0.01
