# Supplementary material for: Inflammatory Adipokines, High Molecular Weight Adiponectin, and Insulin Resistance: A Population-Based Survey in Prepubertal Schoolchildren
Source: PLoS One. 2011 Feb 18;6(2):e17264. doi: 10.1371/journal.pone.0017264 (PMC3041818; doi:10.1371/journal.pone.0017264)
Supplement: Table S4 — Partial correlation coefficients of leptin, HMW adiponectin, L/HMW, pro-inflammatory adipokines and insulin-resistance measures after adjustment for BMIz-score. (DOC) [file pone.0017264.s004.doc]

**Table S4**

|  | Leptin | HMW | L/HMW | Fasting Insulin | HOMA-IR | IL-8 | IL-18 | MCP-1 | RANTES | MIF | sICAM-1 | IP-10 | Resistin |
| --- | --- | --- | --- | --- | --- | --- | --- | --- | --- | --- | --- | --- | --- |
| Leptin | - | -0.031 | 0.722***** | 0.391***** | 0.371***** | 0.003 | -0.037 | -0.004 | 0.109 | 0.108 | 0.002 | 0.063 | 0.011 |
| HMW | -0.031 | - | -0.660***** | -0.178**†** | -0.149**†** | -0.056 | -0.073 | -0.011 | -0.003 | -0.028 | -0.091 | -0.086 | 0.001 |
| L/HMW | 0.722***** | -0.660***** | - | 0.374***** | 0.338***** | 0.024 | 0.001 | -0.007 | 0.090 | 0.108 | 0.067 | 0.080 | 0. 016 |
| Fasting insulin | 0.391***** | -0.178**†** | 0.374***** | - | 0.973***** | -0.179**†** | 0.070 | 0.191**§** | 0.140**‡** | 0.100 | 0.066 | 0.031 | -0.002 |
| HOMA-IR | 0.371***** | -0.149**†** | 0.338***** | 0.973***** | - | -0.190**†** | -0.033 | -0.054 | 0.067 | 0.075 | 0.191**†** | 0.103 | 0.018 |
| IL-8 | 0.003 | -0.056 | 0.024 | -0.179**†** | -0.190**‡** | - | 0.206**§** | 0.197**§** | 0.203**§** | 0.259***** | 0.039 | 0.120**‡** | 0.226***** |
| IL-18 | -0.037 | -0.073 | 0.001 | 0.070 | -0.033 | 0.206**§** | - | 0.222***** | -0.029 | 0.232***** | 0.250***** | 0.375***** | 0.174**§** |
| MCP-1 | -0.004 | -0.011 | -0.007 | 0.191**§** | -0.054 | 0.197**§** | 0.222***** | - | 0.113**‡** | -0.094 | 0.289***** | 0.194**§** | -0.076 |
| RANTES | 0.109 | -0.003 | 0.090 | 0.140**‡** | 0.067 | 0.203**§** | -0.029 | 0.113**‡** | - | 0.428***** | 0.269***** | 0.036 | 0.295***** |
| MIF | 0.108 | -0.028 | 0.108 | 0.100 | 0.075 | 0.259***** | 0.232***** | -0.094 | 0.428***** | - | 0.329**‡** | 0.197**§** | 0.630***** |
| sICAM-1 | 0.002 | -0.091 | 0.067 | 0.066 | 0.191**†** | 0.039 | 0.250***** | 0.289***** | 0.269***** | 0.329***** | - | 0.332***** | 0.346***** |
| IP-10 | 0.063 | -0.086 | 0.080 | 0.031 | 0.103 | 0.120**‡** | 0.375**‡** | 0.194**§** | 0.036 | 0.197**§** | 0.332***** | - | 0.187**§** |
| Resistin | 0.011 | 0.001 | 0. 016 | -0.002 | 0.018 | 0.226***** | 0.174**§** | -0.076 | 0.295***** | 0.630***** | 0.346***** | 0.187**§** | - |

Partial correlation coefficients of leptin, HMW adiponectin, L/HMW, pro-inflammatory adipokines and insulin-resistance measures after adjustment for BMI*z-score.*

******p*<0.0001; **†***p*<0.01; **‡***p*<0.05; **§***p*<0.001
