# Supplementary material for: Inflammatory Adipokines, High Molecular Weight Adiponectin, and Insulin Resistance: A Population-Based Survey in Prepubertal Schoolchildren
Source: PLoS One. 2011 Feb 18;6(2):e17264. doi: 10.1371/journal.pone.0017264 (PMC3041818; doi:10.1371/journal.pone.0017264)
Supplement: Table S5 — Multiple regression models for the prediction of leptin (dependent variable) in boys. β-coefficients, p-values and determination coefficients of regression models (R2) are given. (DOC) [file pone.0017264.s005.doc]

**Table S5**

| Model | Independent  variable(s) | ß | *p-value* | Model R2 |
| --- | --- | --- | --- | --- |
|
| **1** | BMI*z-score* | 0.756 | <0.0001 | 0.571 |
| **2** | BMI*z-score* | 0.630 | <0.0001 | 0.629 |
| HOMA-IR | 0.156 | <0.001 |
| Triglycerides | 0.172 | <0.001 |
| LDL | -0.054 | *NS* |
| **3** | BMI*z-score* | 0.623 | <0.0001 | 0.645 |
| HOMA-IR | 0.161 | <0.001 |
| Triglycerides | 0.181 | <0.01 |
| LDL | -0.056 | *NS* |
| HMW | 0.078 | *NS* |
| MCP-1 | 0.047 | *NS* |
| RANTES | 0.093 | *NS* |
| MIF | -0.070 | *NS* |

Multiple regression models for the prediction of leptin (dependent variable) in boys. ß-coefficients, *p*-*values* and determination coefficients of regression models (R2) are given.

*NS,* statistically not significant.
